# Supplementary material for: Significance of CCL2, CCL5 and CCR2 polymorphisms for adverse prognosis of Japanese encephalitis from an endemic population of India
Source: PubMed Central journal article supplement (PMC5651904; doi:10.1038/s41598-017-14091-8), 2017-10-20

## Significance of CCL2, CCL5 and CCR2 polymorphisms for adverse prognosis of Japanese encephalitis from an endemic population of India

Purvita Chowdhury<sup>1</sup>, and Siraj Ahmed Khan<sup>1,\*</sup>

<sup>1</sup>Arbovirology division, Regional Medical Research Centre, NE Region, ICMR, Dibrugarh-786001, Assam, India

\*sirajkhanicmr@gmail.com

**Corresponding author:** Siraj Ahmed Khan

### Supplementary information

**Supplementary Table S1. Demographic characteristics among cases and controls.** P value for age was calculated by two tailed t-test and chi square test was used for gender, fatality and vaccination. \* denotes significance at <0.05. Values are expressed as mean  $\pm$  standard deviation and absolute numbers (%). Abbreviations: P value, level of significance; SD, standard deviation.

|                               | Severe (n=63)     | Mild (n=24)      | Control (n=94)    | P value |
|-------------------------------|-------------------|------------------|-------------------|---------|
| Age (in years, mean $\pm$ SD) | 44.84 $\pm$ 20.17 | 42.13 $\pm$ 19.8 | 35.28 $\pm$ 15.65 | 0.003*  |
| <b>Gender</b>                 |                   |                  |                   |         |
| Male (%)                      | 43 (68.25%)       | 11 (45.83%)      | 55 (58.51%)       | 0.143   |
| Female (%)                    | 20 (31.74%)       | 13 (54.16%)      | 39 (41.48%)       |         |
| <b>Fatality (%)</b>           | 21 (67.74%)       | 10 (32.25%)      | -                 | 0.005*  |
| <b>Vaccination history</b>    |                   |                  |                   |         |
| Not vaccinated                | 55                | 21               | 94                | 0.98    |
| Vaccinated                    | 8                 | 3                |                   |         |

**Supplementary Table S2. Genotypic and allelic distribution among JE mild and severe cases compared to controls.** Odds ratio was calculated by chi square test and \* denotes statistical significance at P<0.05. Abbreviations: rs ID, reference SNP cluster ID; CI, confidence interval; P value, level of significance

| Type of JE | Gene rs id | Genotype/ Allele | Case | Control (n=94) | Odds ratio (95% CI) | P value |
|------------|------------|------------------|------|----------------|---------------------|---------|
| Mild JE    | CCL2       | AA               | 11   | 57             | 0.549 (0.22-1.35)   | 0.247   |

|                            |                   |    |     |                     |                     |        |
|----------------------------|-------------------|----|-----|---------------------|---------------------|--------|
| <b>(n=24)</b>              | rs1024611         | AG | 6   | 30                  | 0.711 (0.25-1.97)   | 0.623  |
|                            |                   | GG | 7   | 7                   | 5.117 (1.58-16.48)  | 0.008* |
|                            |                   | A  | 28  | 144                 | 0.427 (0.21-0.83)   | 0.017  |
|                            |                   | G  | 20  | 44                  | 2.337 (1.2-4.54)    | 0.017* |
|                            | CCL2<br>rs2857656 | GG | 15  | 60                  | 0.669 (0.27-1.65)   | 0.48   |
|                            |                   | GC | 7   | 27                  | 0.653 (0.22-1.92)   | 0.461  |
|                            |                   | CC | 2   | 7                   | 4.142 (0.24-13.79)  | 0.024  |
|                            |                   | G  | 37  | 147                 | 0.508 (0.25-1.0)    | 0.06   |
|                            |                   | C  | 11  | 41                  | 1.966 (0.99-3.90)   | 0.06   |
|                            | CCL5<br>rs2280788 | CC | 19  | 89                  | 0.21 (0.056-0.811)  | 0.028  |
|                            |                   | GC | 4   | 5                   | 3.56 (0.876-14.457) | 0.081  |
|                            |                   | GG | 1   | 0                   | -                   |        |
|                            |                   | C  | 42  | 183                 | 0.19 (0.055-0.656)  | 0.01   |
|                            |                   | G  | 6   | 5                   | 5.22 (1.523-17.947) | 0.01*  |
|                            | CCL5<br>rs2107538 | GG | 7   | 46                  | 0.42 (0.163-1.131)  | 0.108  |
|                            |                   | AG | 13  | 34                  | 2.08 (0.842-5.163)  | 0.160  |
|                            |                   | AA | 3   | 14                  | 0.816 (0.214-3.106) | 1      |
|                            |                   | G  | 27  | 126                 | 0.69 (0.361-1.354)  | 0.303  |
|                            |                   | A  | 19  | 62                  | 1.43 (0.738-2.769)  | 0.303  |
|                            | CCR2<br>rs1799864 | GG | 12  | 74                  | 0.02 (0.105-0.692)  | 0.008* |
|                            |                   | AG | 9   | 17                  | 2.71 (1.02-7.232)   | 0.053  |
|                            |                   | AA | 2   | 3                   | 2.75 (0.434-17.517) | 0.581  |
|                            |                   | G  | 33  | 165                 | 0.35 (0.162-0.768)  | 0.01*  |
|                            |                   | A  | 13  | 23                  | 2.82 (1.3-6.14)     | 0.01*  |
|                            | CCR5<br>rs1799987 | GG | 11  | 35                  | 1.42 (0.576-3.537)  | 0.486  |
|                            |                   | AG | 9   | 35                  | 1.01 (0.4-2.553)    | 1      |
|                            |                   | AA | 4   | 20                  | 0.74 (0.227-2.412)  | 0.779  |
|                            |                   | G  | 31  | 105                 | 1.44 (0.746-2.782)  | 0.327  |
| A                          |                   | 17 | 83  | 0.693 (0.359-1.339) | 0.327               |        |
| Severe JE<br><b>(n=63)</b> | CCL2<br>rs1024611 | AA | 36  | 57                  | 0.865 (0.45-1.65)   | 0.74   |
|                            |                   | AG | 16  | 30                  | 0.726 (0.35-1.48)   | 0.474  |
|                            |                   | GG | 11  | 7                   | 2.629 (0.95-7.2)    | 0.073  |
|                            |                   | A  | 88  | 144                 | 0.707 (0.42-1.17)   | 0.192  |
|                            |                   | G  | 38  | 44                  | 1.413 (0.84-2.35)   | 0.192  |
|                            | CCL2<br>rs2857656 | GG | 43  | 60                  | 1.282 (0.64-2.54)   | 0.49   |
|                            |                   | GC | 16  | 27                  | 0.863 (0.41-1.77)   | 0.718  |
|                            |                   | CC | 3   | 7                   | 0.632 (0.15-2.54)   | 0.74   |
|                            |                   | G  | 102 | 147                 | 1.293 (0.72-2.30)   | 0.392  |
|                            |                   | C  | 22  | 41                  | 0.773 (0.43-1.37)   | 0.392  |
|                            | CCL5              | CC | 56  | 89                  | 0.44 (0.136-1.485)  | 0.224  |

|  |                   |    |     |     |                     |        |
|--|-------------------|----|-----|-----|---------------------|--------|
|  | rs2280788         | GC | 7   | 5   | 2.22 (0.673-7.353)  | 0.224  |
|  |                   | GG | 0   | 0   | -                   |        |
|  |                   | C  | 119 | 183 | 0.46 (0.144-1.497)  | 0.233  |
|  |                   | G  | 7   | 5   | 2.15 (0.667-6.941)  | 0.233  |
|  | CCL5<br>rs2107538 | GG | 8   | 46  | 0.83 (0.326-2.115)  | 0.816  |
|  |                   | AG | 23  | 34  | 1.01 (0.522-1.969)  | 1      |
|  |                   | AA | 32  | 14  | 1.07 (0.568-2.039)  | 0.871  |
|  |                   | G  | 39  | 126 | 0.91 (0.561-1.479)  | 0.713  |
|  |                   | A  | 87  | 62  | 1.09 (0.675-1.782)  | 0.713  |
|  | CCR2<br>rs1799864 | GG | 36  | 74  | 3.79 (0.941-15.267) | 0.09   |
|  |                   | AG | 18  | 17  | 1.81 (0.848-3.866)  | 0.17   |
|  |                   | AA | 7   | 3   | 0.36 (0.178-0.727)  | 0.004* |
|  |                   | G  | 90  | 165 | 0.39 (0.216-0.710)  | 0.002* |
|  |                   | A  | 32  | 23  | 2.55 (1.408-4.620)  | 0.002* |
|  | CCR5<br>rs1799987 | GG | 20  | 35  | 0.78 (0.399-1.540)  | 0.5    |
|  |                   | AG | 25  | 35  | 1.10 (0.575-2.136)  | 0.867  |
|  |                   | AA | 18  | 20  | 1.48 (0.708-3.091)  | 0.343  |
|  |                   | G  | 65  | 105 | 0.84 (0.535-1.324)  | 0.489  |
|  |                   | A  | 61  | 83  | 1.18 (0.754-1.867)  | 0.489  |

**Supplementary Table S3: Parametric and non-parametric test for serum concentration of chemokines CCL2 and CCL5.** One way analysis of variance (ANOVA) and Kruskal Wallis test was performed for parametric and non-parametric analyses. The data revealed similar significant values ( $P < 0.05$ ) in both parametric and non-parametric tests. The manuscript Fig. 2 depicts P-values for parametric tests only.

|                                            | <b>Parametric test<br/>(P-value)</b> | <b>Non-parametric test<br/>(P-value)</b> |
|--------------------------------------------|--------------------------------------|------------------------------------------|
| <b>Serum protein concentration</b>         |                                      |                                          |
| CCL2 protein level                         | 0.0002                               | 0.0001                                   |
| CCL5 protein level                         | <0.0001                              | <0.0001                                  |
| <b>Genotype wise protein concentration</b> |                                      |                                          |
| CCL2 rs1024611                             | 0.004                                | 0.0015                                   |
| CCL5 rs2280788                             | 0.237                                | 0.441                                    |

**Supplementary Figure S4:** Kaplan Meier curve for *CCL2* rs1024611, *CCL5* rs2280788 and *CCR2* rs1799864.

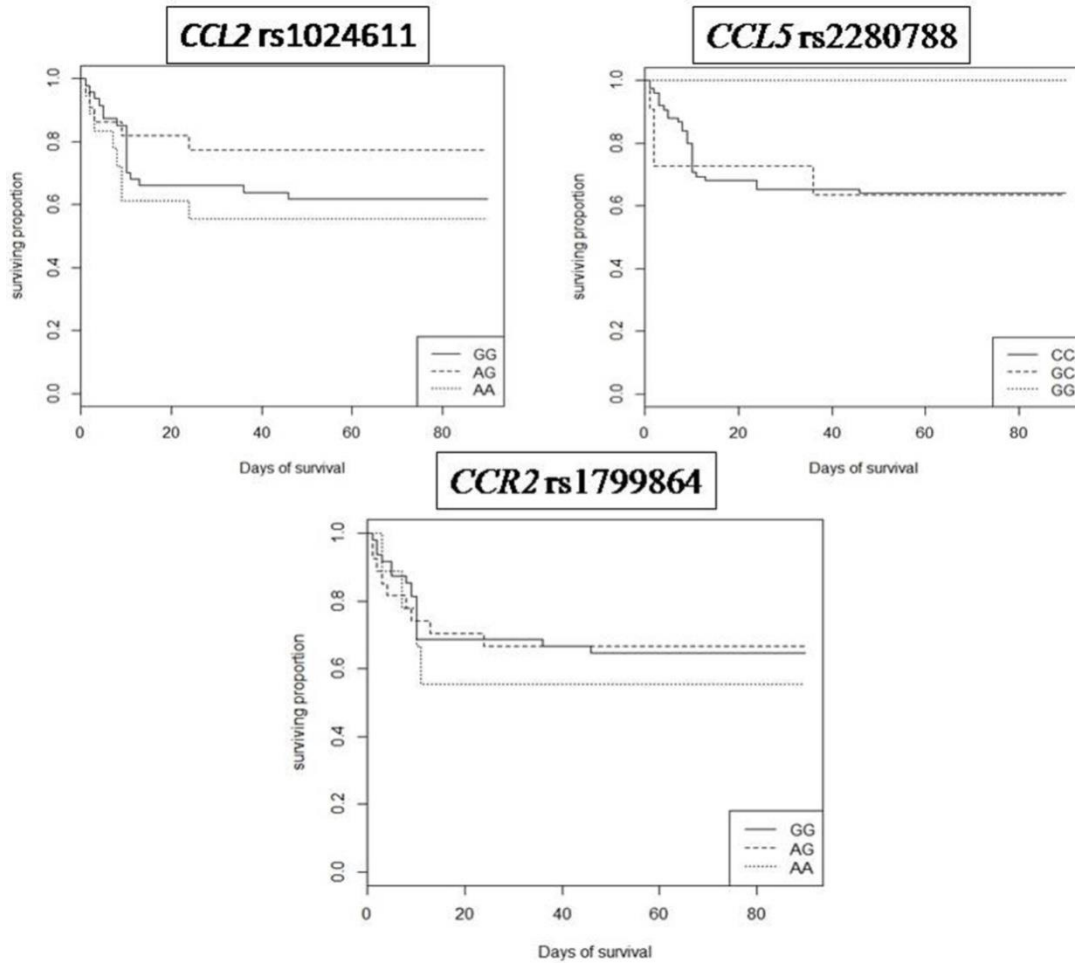

**Supplementary Table S5: Genetic factors and chemokine levels relating to clinical phenotypes of JE.** Multinomial Logistic Regression was used to examine the effect of chemokine protein level and corresponding genotype on the study groups (where 0 = control, 1=mild JE, 2 = Severe JE). This model explains the extent of effect the protein level and genotype independently or in interaction has on any of the disease group when compared with the baseline level (controls). SNP1=rs1024611; SNP4= rs2280788; SNP5= rs1799864; \* indicate statistically significant at P value <0.05

| Predictor                                        | JE Status | Coefficients | P value |
|--------------------------------------------------|-----------|--------------|---------|
| <b>Independent effect of genotype on disease</b> |           |              |         |
| <b>SNP1</b>                                      | Mild      | 0.392        | 0.371   |
|                                                  | Severe    | 0.245        | 0.407   |
| <b>SNP4</b>                                      | Mild      | 0.843        | 0.612   |

|                                                           |        |              |        |
|-----------------------------------------------------------|--------|--------------|--------|
|                                                           | Severe | 1.556        | 0.229  |
| <b>SNP5</b>                                               | Mild   | 1.052        | 0.028* |
|                                                           | Severe | 0.868        | 0.015* |
| <b>Effect of genotype-genotype interaction on disease</b> |        |              |        |
| <b>SNP1:SNP4</b>                                          | Mild   | 0.852        | 0.386  |
|                                                           | Severe | 0.009        | 0.991  |
| <b>SNP1:SNP5</b>                                          | Mild   | -0.118       | 0.829  |
|                                                           | Severe | 0.110        | 0.797  |
| <b>SNP4:SNP5</b>                                          | Mild   | -0.849       | 0.502  |
|                                                           | Severe | -1.757       | 0.127  |
| <b>Effect of protein-protein interaction on disease</b>   |        |              |        |
| <b>CCL2:CCL5</b>                                          | Mild   | -0.005       | -      |
|                                                           | Severe | -0.005       | -      |
| <b>Effect of genotype-protein interaction on disease</b>  |        |              |        |
| <b>SNP1:CCL2</b>                                          | Mild   | 0.010        | 0.015* |
|                                                           | Severe | 0.005        | 0.096  |
| <b>SNP5:CCL2</b>                                          | Mild   | 1.749178e-06 | 0.999  |
|                                                           | Severe | 1.652773e-03 | 0.683  |
| <b>SNP4:CCL5</b>                                          | Mild   | 0.020        | 0.703  |
|                                                           | Severe | -0.001       | 0.973  |

**Supplementary Table S6. Frequency distribution of SNPs in world populations based on 1000 Genome Project.** Similar frequency distribution of rs1024611 and rs2280788 among Asian and the study populations probably reflects the scenario of JE disease burden for the countries. However, rs1799864 among the study population was observed to be comparatively than other populations

| <b>SNP</b>      | <b>rs1024611A</b> | <b>rs2857656G</b> | <b>rs2280788G</b> | <b>rs2107538C</b> | <b>rs1799864G</b> | <b>rs1799987A</b> |
|-----------------|-------------------|-------------------|-------------------|-------------------|-------------------|-------------------|
| <b>African</b>  | 0.24              | 0.44              | 0.01              | 0.43              | 0.2               | 0.59              |
| <b>American</b> | 0.46              | 0.47              | 0.01              | 0.25              | 0.19              | 0.43              |
| <b>Asian</b>    | 0.61              | 0.61              | 0.11              | 0.33              | 0.22              | 0.56              |
| <b>European</b> | 0.33              | 0.32              | 0.01              | 0.17              | 0.10              | 0.46              |
| <b>Assam</b>    | 0.66              | 0.76              | 0.07              | 0.65              | 0.70              | 0.44              |

**Supplementary Figure S7. Gel electrophoresis images of genotyping for all the studied SNPs. Abbreviations: M, molecular size marker; bp, base pairs, NC, negative control.**

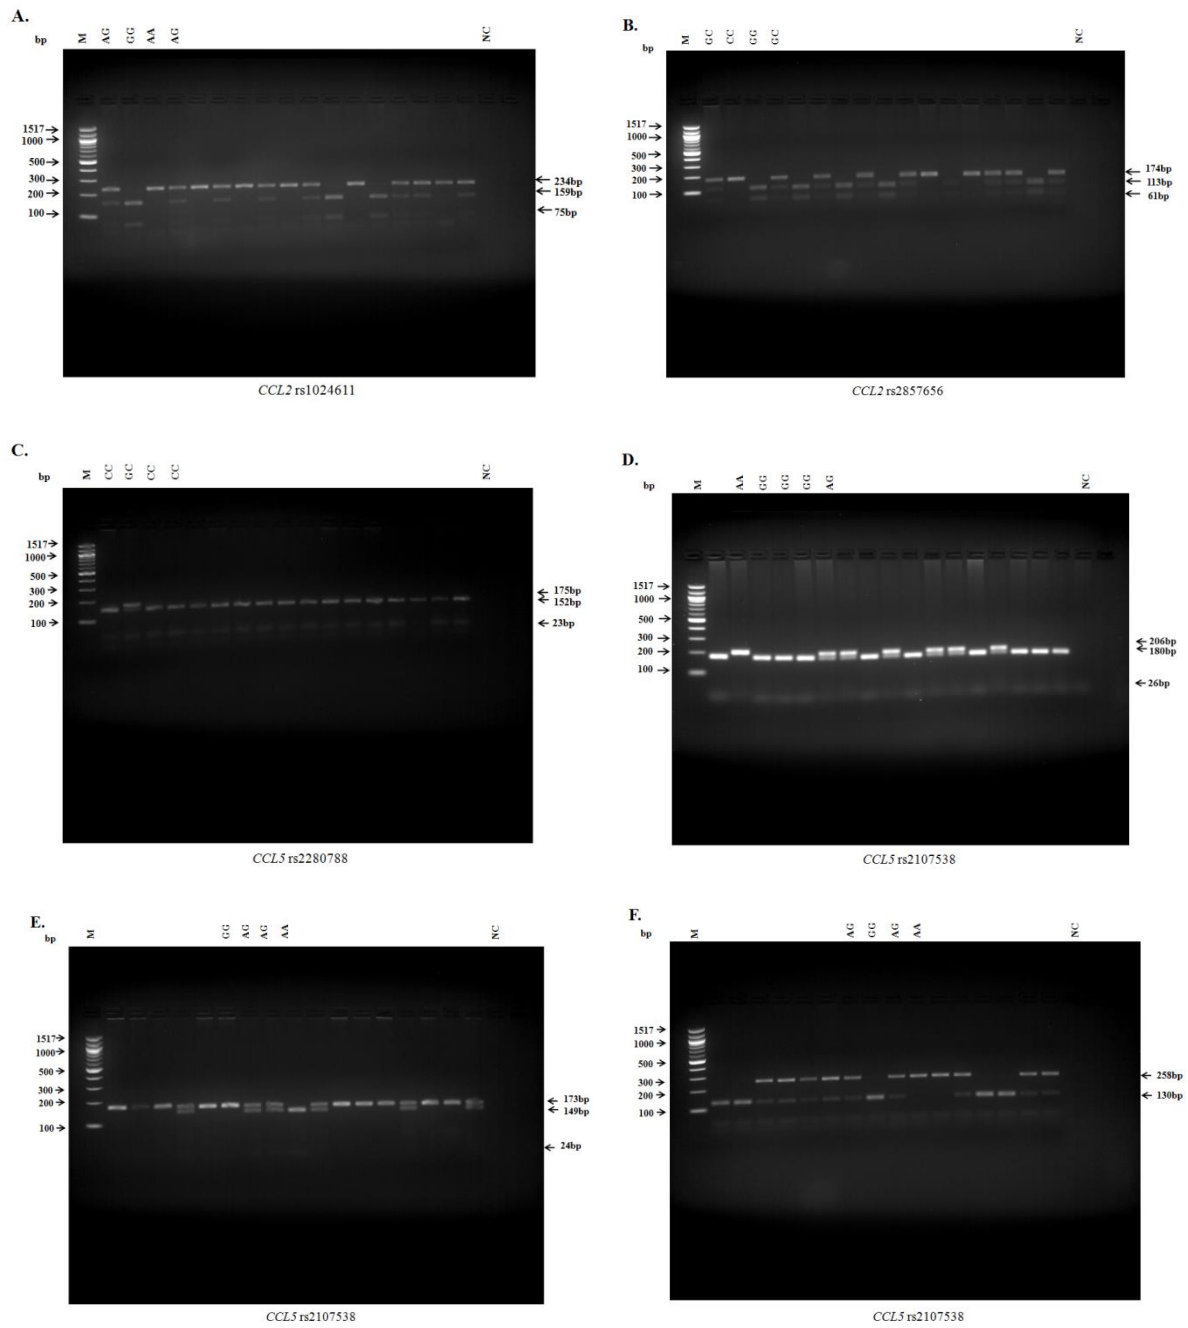

Supplement: 41598_2017_14091_MOESM1_ESM.pdf [file 41598_2017_14091_MOESM1_ESM.pdf]
